# Supplementary material
Source: PubMed Central journal article supplement (PMC6571472)
Supplement: rspb20182898supp1.pdf [file rspb20182898supp1.pdf]

## Supplementary materials

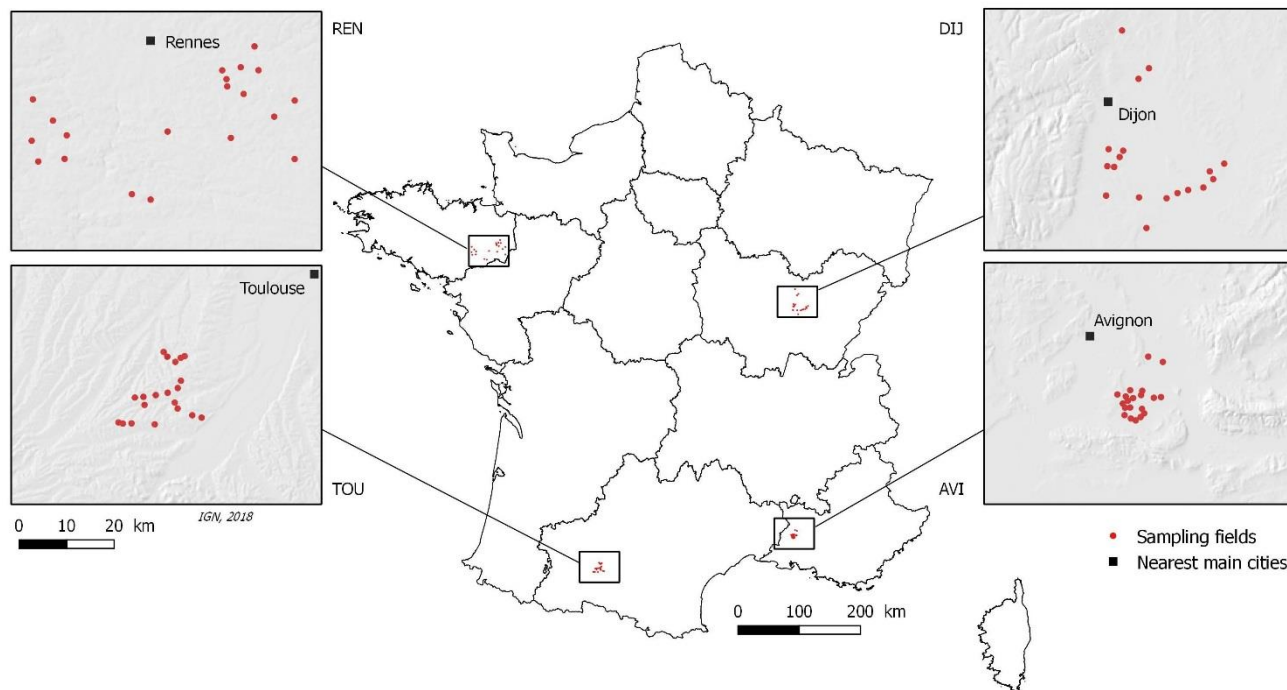

**Figure S1.** Location of the 80 monitored fields.

**Table S1.** Number of each cover type ( $N = 8$ ) in sampling fields each year ( $N = 3$ ) in each study area ( $N = 4$ ). AVI: Avignon; DIJ: Dijon; REN: Rennes; TOU: Toulouse.

| Crop type            | 2014 |     |     |     | 2015 |     |     |     | 2016 |     |     |     |
|----------------------|------|-----|-----|-----|------|-----|-----|-----|------|-----|-----|-----|
|                      | AVI  | DIJ | REN | TOU | AVI  | DIJ | REN | TOU | AVI  | DIJ | REN | TOU |
| Cereal               | 10   | 20  | 19  |     | 15   | 7   | 3   |     | 6    | 11  | 9   |     |
| Summer crop          |      |     |     | 1   | 2    | 10  | 7   |     | 6    | 4   | 2   |     |
| Oleaginous           |      | 10  |     |     |      | 2   | 1   | 1   | 5    | 1   |     |     |
| Legume               |      |     |     |     | 1    |     | 4   |     | 3    |     | 4   |     |
| Apple                | 20   |     |     |     | 20   |     |     |     | 20   |     |     |     |
| Grass/Legume mixture |      |     |     |     |      |     | 2   | 2   |      |     | 2   |     |
| Meadow               |      |     |     |     |      |     |     |     |      |     | 2   | 3   |
| Fallow               |      |     |     |     |      |     |     | 2   |      |     |     |     |

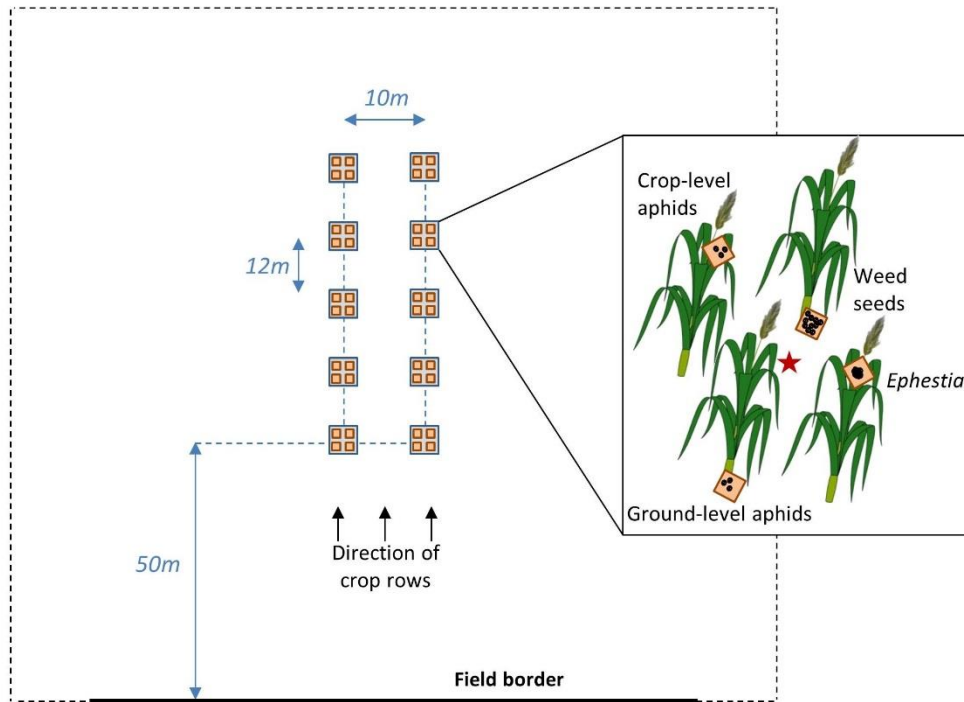

**Figure S2. Schematic representation of the field monitoring design**

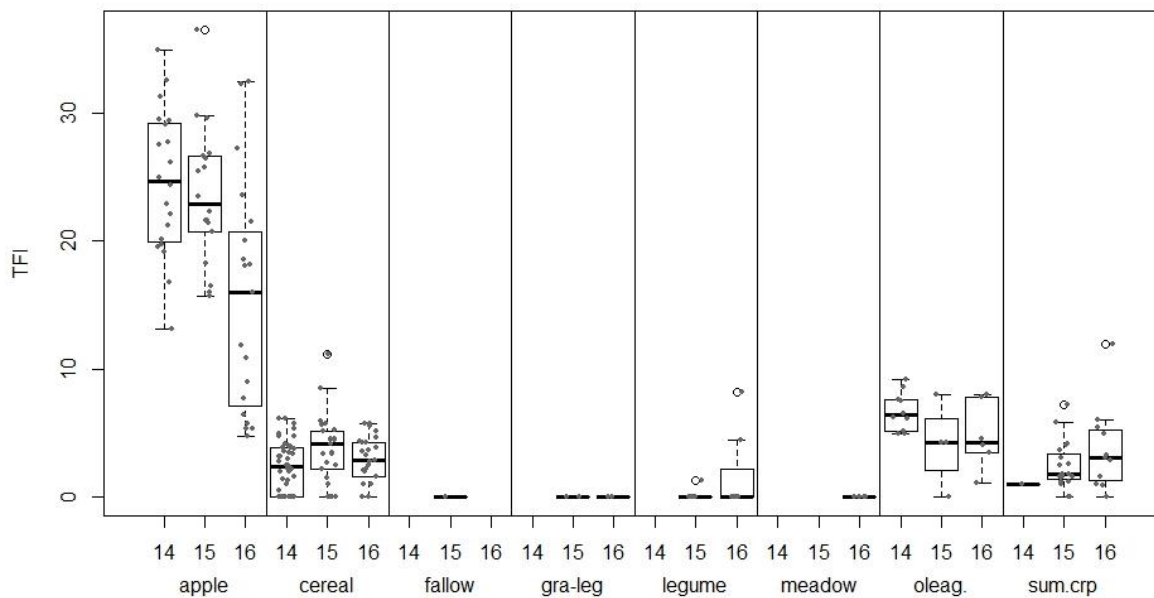

**Figure S3. Variation of the Treatment Frequency Index (TFI) between the different crop types (apple, cereal, fallow, grass/legume mixture, legume, meadow, oleaginous, summer crops) each year (14: 2014; 15: 2015; 16: 2016).**

**Table S2. Date the two session of card installation and corresponding cumulated temperature since the January 1<sup>st</sup>.**

| Year | Area | Crop type                                          | Number of fields | Date session 1 | Cumulated temperature (°C) | Date session 2 | Cumulated temperature (°C) |
|------|------|----------------------------------------------------|------------------|----------------|----------------------------|----------------|----------------------------|
| 2014 | AVI  | Apple                                              | 20               | 23/04/2014     | 1198                       | 11/05/2014     | 1495                       |
| 2014 | DIJ  | Cereal, Oleaginous                                 | 20               | 14/05/2014     | 1131                       | 11/06/2014     | 1601                       |
| 2014 | REN  | Cereal                                             | 20               | 04/05/2014     | 1105                       | 01/06/2014     | 1484                       |
| 2014 | TOU  | Cereal, Summer crops                               | 20               | 13/04/2014     | 987                        | 18/05/2014     | 1476                       |
| 2015 | AVI  | Apple                                              | 20               | 23/04/2015     | 1030                       | 18/05/2015     | 1468                       |
| 2015 | DIJ  | Cereal, Legume, Oleaginous                         | 18               | 28/05/2015     | 1155                       | 22/06/2015     | 1626                       |
| 2015 | DIJ  | Summer crops                                       | 2                | 02/07/2015     | 1842                       | 16/07/2015     | 2184                       |
| 2015 | REN  | Cereal, Grass/Legume mixture, Oleaginous           | 10               | 18/05/2015     | 1181                       | 15/06/2015     | 1590                       |
| 2015 | REN  | Summer crops                                       | 10               | 15/06/2015     | 1590                       | 31/08/2015     | 3008                       |
| 2015 | TOU  | Cereal, Legume, Oleaginous                         | 6                | 29/04/2015     | 1039                       | 27/05/2015     | 1506                       |
| 2015 | TOU  | Fallow, Grass/Legume mixture, Legume, Summer crops | 13               | 03/06/2015     | 1643                       | 01/07/2015     | 2253                       |
| 2016 | AVI  | Apple                                              | 20               | 28/04/2016     | 1175                       | 30/05/2016     | 1701                       |
| 2016 | DIJ  | Cereal, Legume, Oleaginous                         | 14               | 19/05/2016     | 988                        | 09/06/2016     | 1315                       |
| 2016 | DIJ  | Summer crops                                       | 6                | 30/06/2016     | 1697                       | 21/07/2016     | 2131                       |
| 2016 | REN  | Cereal, Grass/Legume mixture, Meadow, Oleaginous   | 16               | 11/05/2016     | 1059                       | 09/06/2016     | 1484                       |
| 2016 | REN  | Summer crops                                       | 4                | 09/06/2016     | 1484                       | 29/08/2016     | 2969                       |
| 2016 | TOU  | Cereal                                             | 9                | 25/04/2016     | 1082                       | 23/05/2016     | 1476                       |
| 2016 | TOU  | Fallow, Legume, Summer crops                       | 9                | 06/06/2016     | 1720                       | 04/07/2016     | 2274                       |

**Table S3. Number of fields effectively included in the analysis for the each type of sentinel prey cards.**

| Sentinel prey type          | Region | Session 1 |      |      | Session 2 |      |      |
|-----------------------------|--------|-----------|------|------|-----------|------|------|
|                             |        | 2014      | 2015 | 2016 | 2014      | 2015 | 2016 |
| <i>Ephestia</i> eggs        | AVI    | 20        | 18   | 15   | 20        | 18   | 19   |
|                             | DIJ    | 20        | 0    | 17   | 20        | 18   | 19   |
|                             | REN    | 20        | 20   | 18   | 20        | 20   | 19   |
|                             | TOU    | 17        | 17   | 17   | 17        | 17   | 14   |
| Groud-level aphid           | AVI    | 20        | 18   | 19   | 20        | 18   | 19   |
|                             | DIJ    | 20        | 20   | 18   | 20        | 20   | 20   |
|                             | REN    | 20        | 20   | 18   | 20        | 20   | 19   |
|                             | TOU    | 17        | 17   | 17   | 17        | 17   | 17   |
| Crop-level aphid            | AVI    | 20        | 18   | 19   | 20        | 18   | 19   |
|                             | DIJ    | 20        | 20   | 17   | 20        | 20   | 19   |
|                             | REN    | 20        | 20   | 18   | 20        | 20   | 19   |
|                             | TOU    | 17        | 17   | 17   | 17        | 17   | 17   |
| <i>Viola arvensis</i> seeds | AVI    | 20        | 18   | 16   | 19        | 18   | 19   |
|                             | DIJ    | 20        | 20   | 18   | 20        | 18   | 20   |
|                             | REN    | 20        | 20   | 18   | 20        | 20   | 19   |
|                             | TOU    | 17        | 17   | 17   | 17        | 17   | 15   |

**Table S4. Definition of the explanatory variables**

| Variable name | Signification                                                                                                  |
|---------------|----------------------------------------------------------------------------------------------------------------|
| SHDI          | Shannon diversity of the landscape (7 classes <sup>a</sup> ) in 1km <sup>2</sup> buffer                        |
| pWood         | proportion of land area covered by woody elements in 1km <sup>2</sup> buffer                                   |
| pMeadow       | proportion of land area covered by meadows in 1km <sup>2</sup> buffer                                          |
| pSNH          | proportion of land area covered by semi-natural habitats in 1km <sup>2</sup> buffer                            |
| pTargetCrop   | proportion of land area covered by crops similar to the crop in the monitored field in 1km <sup>2</sup> buffer |
| iWood         | total length of the interfaces between crops and woods in 1km <sup>2</sup> buffer                              |
| iMeadow       | total length of the interfaces between crops and meadows in 1km <sup>2</sup> buffer                            |
| iSNH          | total length of the interfaces between crops and semi-natural habitats in 1km <sup>2</sup> buffer              |
| TFI           | Treatment Frequency Index in the focal field                                                                   |

<sup>a</sup> Classes: urban areas, woods, fallows, water, annual crops, perennial crops and meadows.

**Table S5. Descriptive statistics (minimum, median and maximum) over the three years of the landscape variables at each region (raw variables).**

| Region | Stat | SHDI | pWood (%) | pMeadow (%) | pSNH (%) | pTargetCrop (%) | iWood (m) | iMeadow (m) | iSNH (m) |
|--------|------|------|-----------|-------------|----------|-----------------|-----------|-------------|----------|
| AVI    | Min. | 1.30 | 2.91      | 9.05        | 13.56    | 5.18            | 1340      | 2636        | 5622     |
|        | Med. | 1.53 | 9.98      | 27.18       | 39.03    | 28.46           | 7758      | 15560       | 23276    |
|        | Max. | 1.82 | 28.44     | 66.47       | 85.22    | 49.05           | 11346     | 30600       | 40496    |
| DIJ    | Min. | 0.30 | 0.26      | 0.69        | 0.94     | 3.56            | 26        | 170         | 1074     |
|        | Med. | 0.99 | 5.23      | 17.63       | 28.33    | 24.51           | 1708      | 2386        | 4506     |
|        | Max. | 1.46 | 29.68     | 52.90       | 69.06    | 75.54           | 5720      | 6704        | 8830     |
| REN    | Min. | 0.78 | 1.47      | 6.14        | 8.09     | 5.07            | 2194      | 938         | 4136     |
|        | Med. | 1.11 | 2.97      | 28.27       | 35.00    | 28.63           | 4518      | 2278        | 7126     |
|        | Max. | 1.44 | 16.61     | 55.66       | 61.32    | 50.17           | 9272      | 4728        | 11828    |
| TOU    | Min. | 0.47 | 5.00      | 0.31        | 7.40     | 0.00            | 3022      | 30          | 4542     |
|        | Med. | 1.09 | 15.84     | 14.44       | 32.18    | 16.29           | 7630      | 1736        | 9602     |
|        | Max. | 1.34 | 22.97     | 48.36       | 71.30    | 77.65           | 13880     | 7130        | 16512    |

SHDI: Shannon diversity index of land cover types; pWood: proportion of land area covered by woody elements, pMeadow: proportion of land covered by meadows; pSNH: proportion of land covered by semi-natural habitats; pTargetCrop: proportion of crops similar to that of the monitored field; iWood: length of interfaces between crops and woods; iMeadow: length of interfaces between crops and meadows; iSNH: length of interfaces between crops and semi-natural habitats; Regions: AVI: Avignon; DIJ: Dijon; REN: Rennes; TOU: Toulouse.

**Table S6. Spearman correlations between explanatory variables (landscape variables and TFI), normalized variables.**

| Variable    | SHDI     | pWood     | pMeadow   | pSNH      | pTargetCrop | iWood    | iMeadow  | iSNH    |
|-------------|----------|-----------|-----------|-----------|-------------|----------|----------|---------|
| pWood       | 0.42 *** |           |           |           |             |          |          |         |
| pMeadow     | 0.45 *** | 0.14 **   |           |           |             |          |          |         |
| pSNH        | 0.52 *** | 0.49 ***  | 0.91 ***  |           |             |          |          |         |
| pTargetCrop | -0.10 *  | -0.34 *** | -0.22 *** | -0.33 *** |             |          |          |         |
| iWood       | 0.24 *** | 0.20 ***  | -0.14 **  | -0.09 ns  | 0.06 ns     |          |          |         |
| iMeadow     | 0.54 *** | 0.04 ns   | 0.29 ***  | 0.23 ***  | 0.08 ns     | 0.03 ns  |          |         |
| iSNH        | 0.51 *** | 0.20 ***  | 0.02 ns   | 0.05 ns   | 0.11 *      | 0.75 *** | 0.59 *** |         |
| TFI         | -0.04 ns | -0.06 ns  | -0.06 ns  | -0.09 *   | 0.04 ns     | -0.11 *  | 0.12 **  | 0.01 ns |

\*  $P < 0.05$ ; \*\*  $P < 0.01$ ; \*\*\*  $P < 0.001$ ; ns: not significant. TFI: Treatment Frequency Index; SHDI: Shannon diversity index of land cover types; pWood: proportion of land area covered by woody elements, pMeadow: proportion of land covered by meadows; pSNH: proportion of land covered by semi-natural habitats; pTargetCrop: proportion of crops similar to that of the monitored field; iWood: length of interfaces between crops and woods; iMeadow: length of interfaces between crops and meadows; iSNH: length of interfaces between crops and semi-natural habitats.

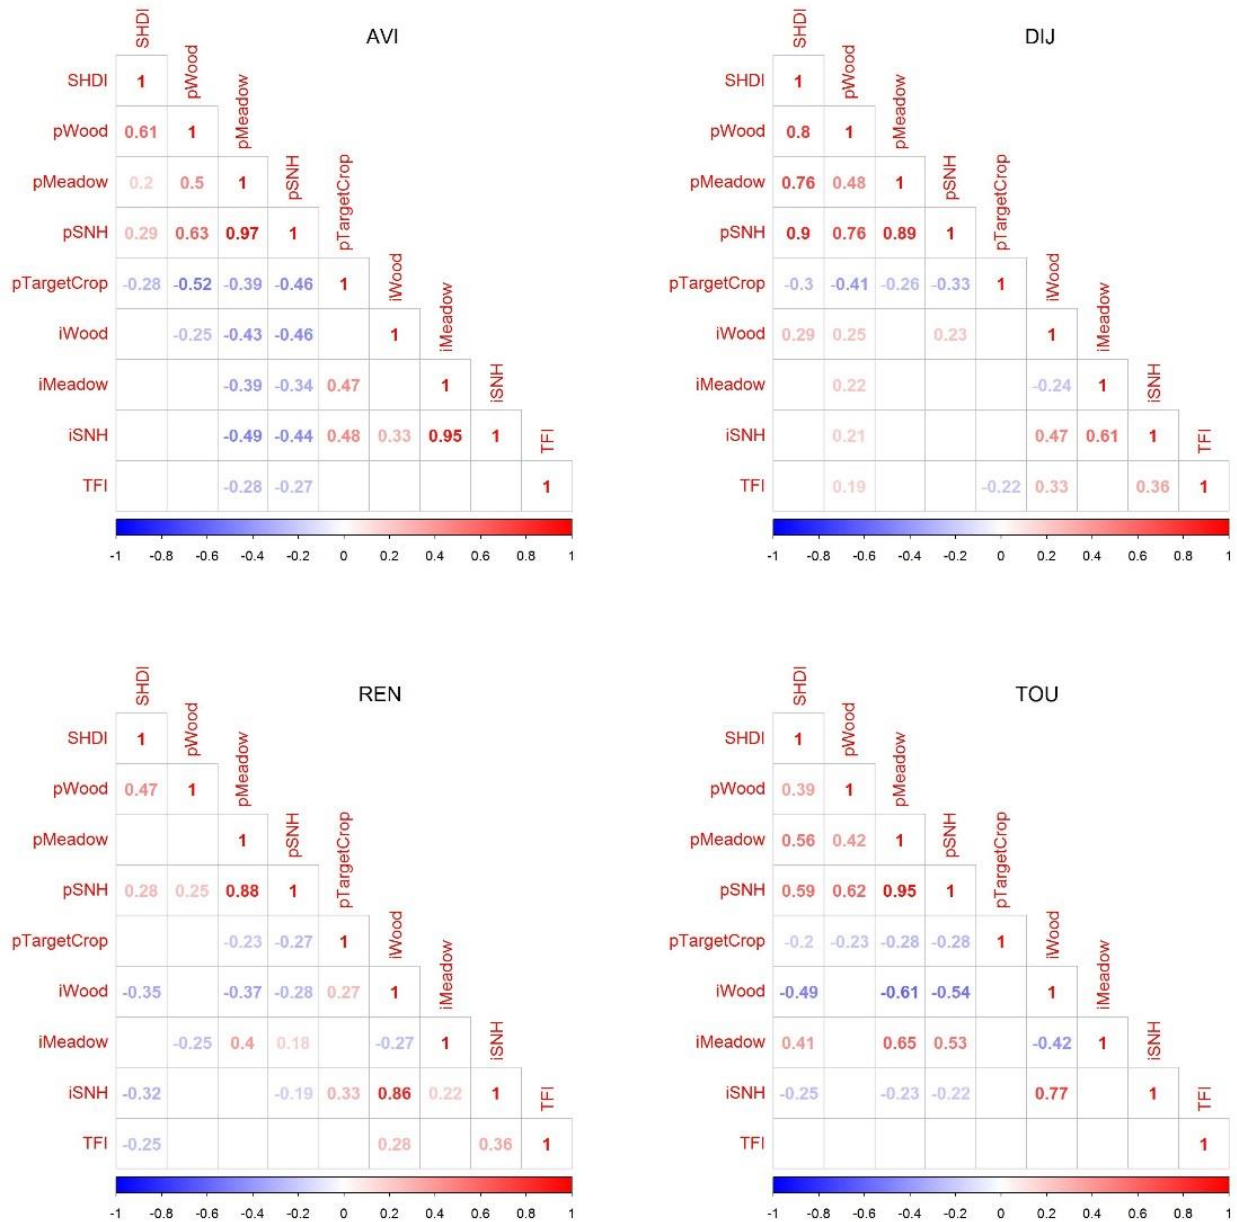

**Figure S4. Spearman correlations between explanatory variables (landscape variables and TFI), normalized variables – Detail for each region**

**Table S7. Correlations between the meteorological variables and the first three axes of the PCA, and percentage of explained variance for each axis.**

| Variable     | 24h meteo dataset |       |       | 96h meteo dataset |       |       |
|--------------|-------------------|-------|-------|-------------------|-------|-------|
|              | PC1               | PC2   | PC3   | PC1               | PC2   | PC3   |
| TM           | -0.71             | -0.67 | -0.05 | 0.59              | -0.77 | 0.03  |
| TN           | -0.53             | -0.67 | -0.32 | 0.50              | -0.76 | -0.04 |
| TX           | -0.72             | -0.61 | 0.12  | 0.61              | -0.73 | -0.03 |
| V            | -0.51             | 0.53  | -0.60 | 0.74              | 0.51  | -0.16 |
| VX           | -0.54             | 0.58  | -0.40 | 0.61              | 0.64  | -0.33 |
| RR           | 0.07              | -0.49 | -0.41 | -0.44             | -0.39 | -0.70 |
| UM           | 0.77              | -0.38 | -0.42 | -0.85             | -0.19 | <0.01 |
| UN           | 0.73              | -0.18 | -0.57 | -0.77             | -0.15 | 0.34  |
| UX           | 0.58              | -0.39 | 0.21  | -0.67             | -0.09 | -0.44 |
| % expl. var. | 37.1              | 27.3  | 15.1  | 42.9              | 28.8  | 10.3  |

### Relating PCA on meteorological conditions with regions, years and sessions

The PCA was used to synthesized meteorological variables that describes the conditions prevailing during the days the sentinel prey cards were exposed. The variability of this meteorological conditions partly results from differences between regions, years and sessions (Figure S5 and S6 below). To quantify the effects of these three factors on the principal components we used t-test and two-by-two least square mean comparisons.

For the 24h meteorological dataset, PC1 opposed REN region (positive values) and TOU region, and PC3 discriminated AVI region (positive values). PC1 was related with 2015 (negative values) and PC3 with 2016 (negative values). The first session was associated with the positive values of the three principal components.

For the 96h meteorological dataset, PC1 opposed REN region (negative values) and TOU region and PC3 discriminated AVI region (negative values). PC1 was related with 2016 (negative values), PC2 with 2014 (negative values) and PC3 with 2015 (positive values). Finally, the first session was associated with PC2 (positive values) and the second session with PC1 (positive values).

Only the predation rates on weed seed cards and *Ephestia* cards were significantly affected by the synthetic meteorological variables. Given the sign of effects (Table 1) and the above described relationships, these significant meteorological effects can be interpreted as partly resulting from higher predation rates of both weed seeds and *Ephestia* in REN than in TOU; and from a higher predation rate of weed seeds in 2016 than in 2014 and 2015.

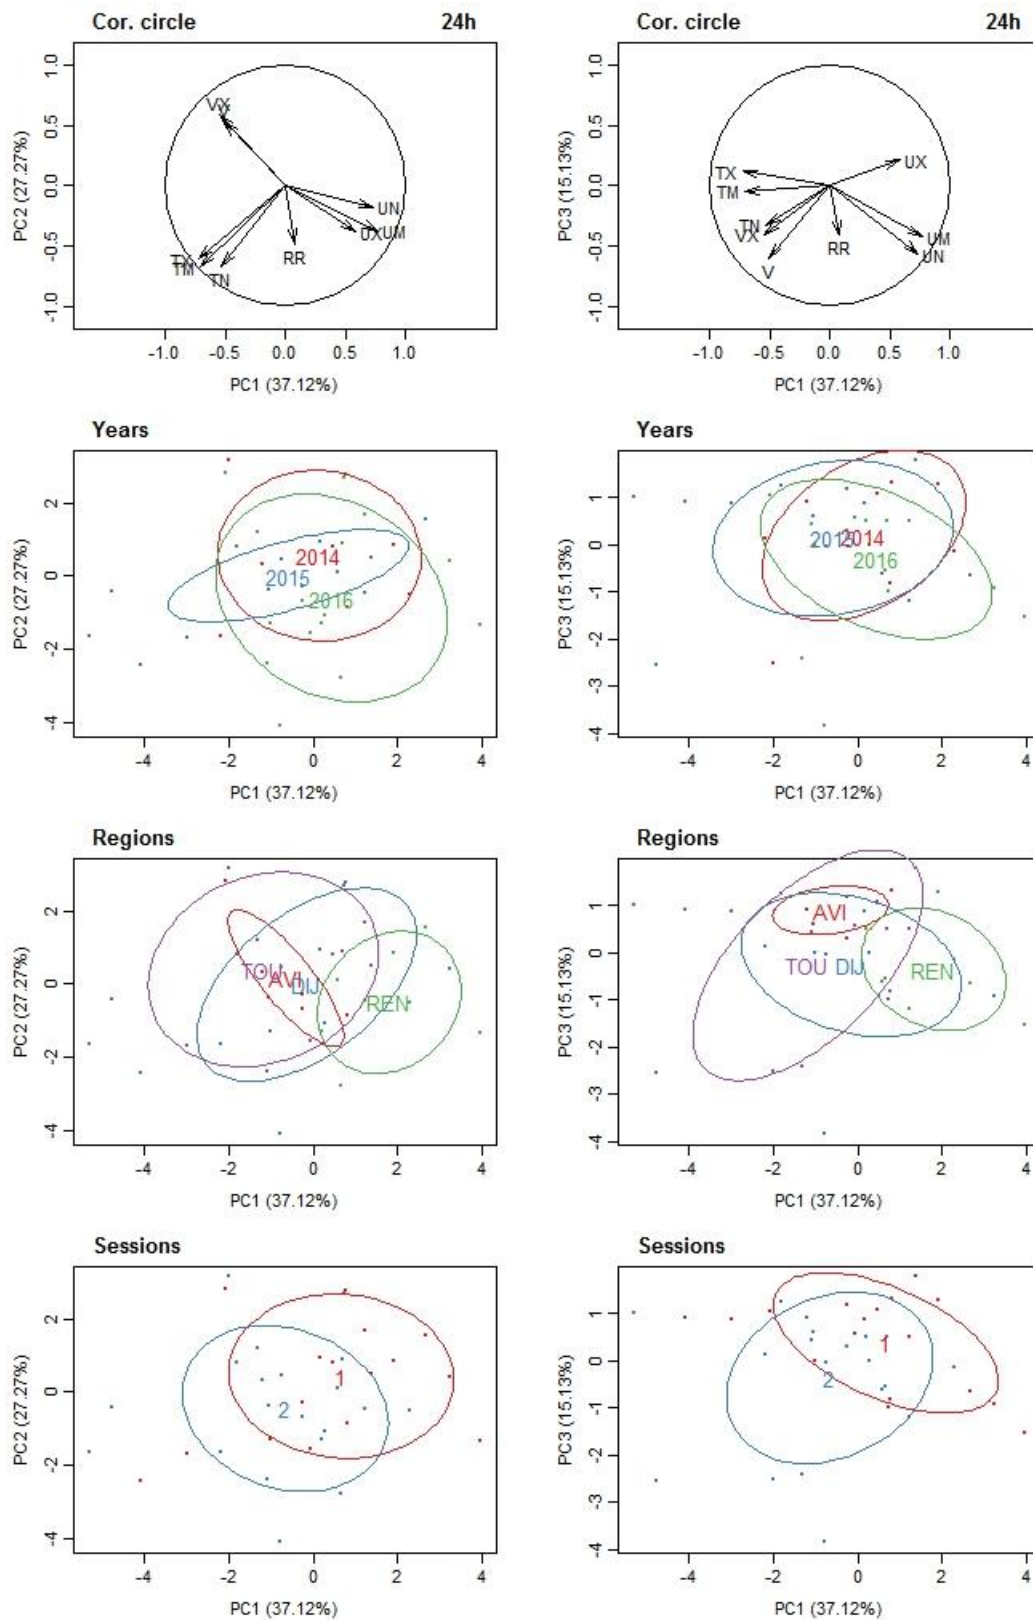

**Figure S5. Variables projection on the PC1-PC2 and PC1-PC3 factorial plans and projection of the years, regions and sessions groups for the 24h meteo dataset.**



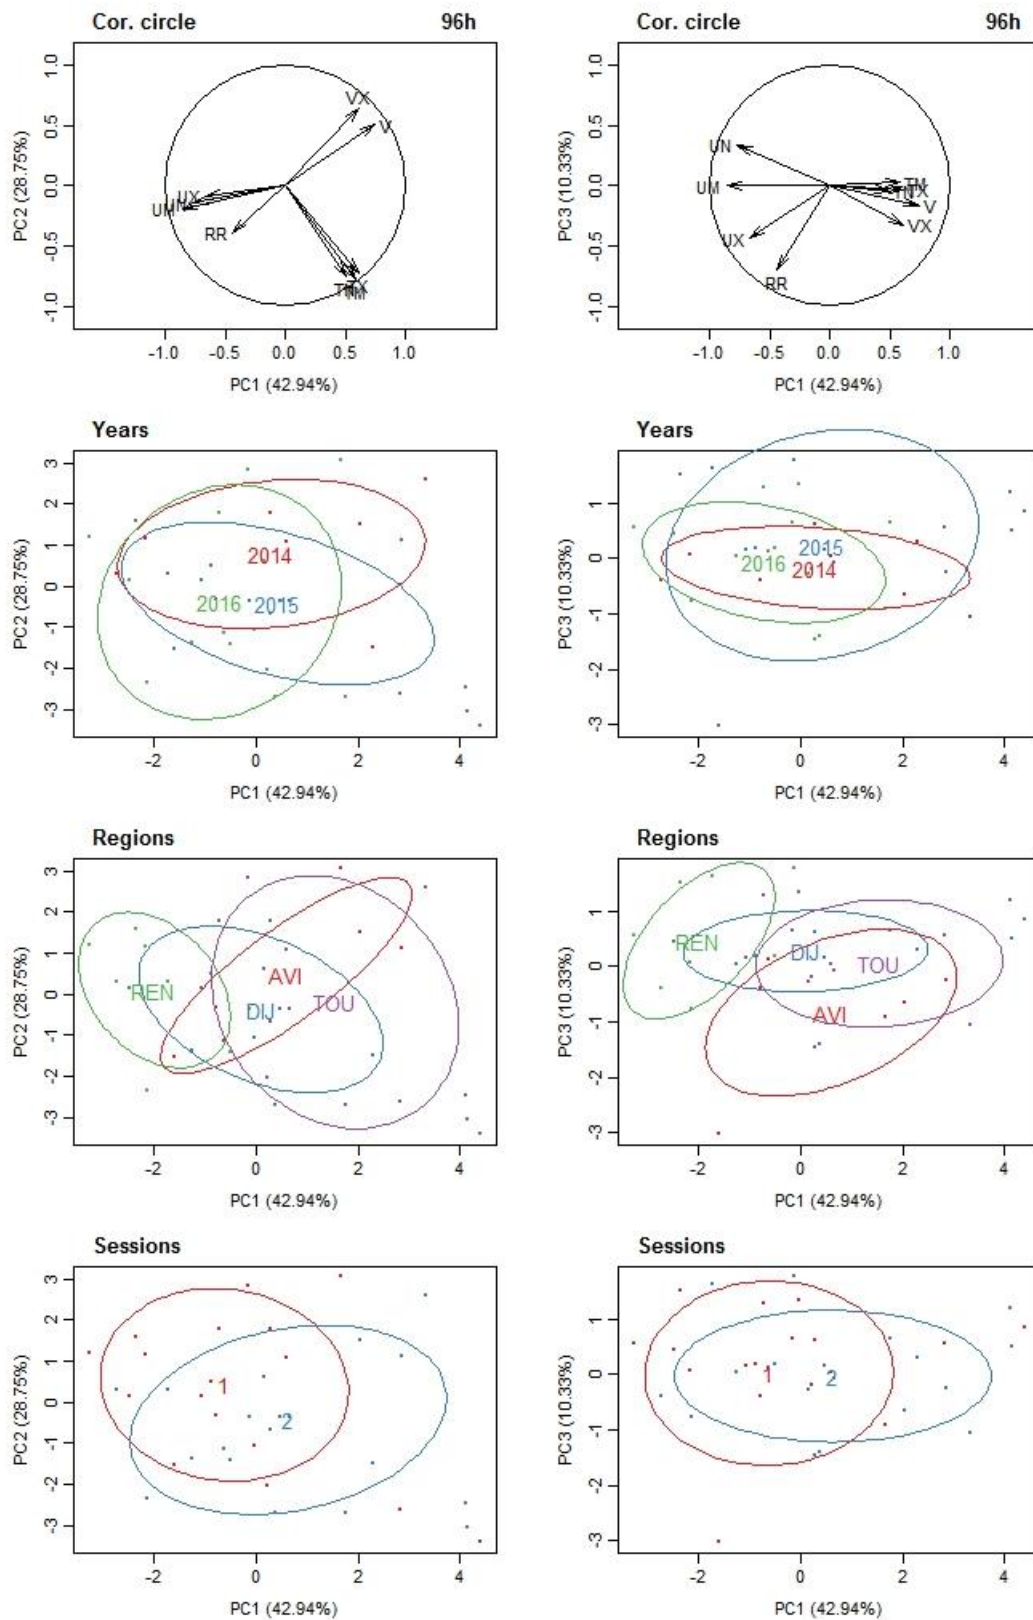

**Figure S6. Variables projection on the PC1-PC2 and PC1-PC3 factorial plans and projection of the years, regions and sessions groups for the 96h meteo dataset.**

**Table S8. Spearman correlations between predation rates on the four types of cards.**

|                    | <i>Ephestia</i> | Ground-level aphid | Crop-level aphid |
|--------------------|-----------------|--------------------|------------------|
| Ground-level aphid | 0.13 **         |                    |                  |
| Crop-level aphid   | 0.27 ***        | 0.26 ***           |                  |
| Weed seed          | 0.29 ***        | 0.25 ***           | 0.08 ns          |

\*  $P < 0.05$ ; \*\*  $P < 0.01$ ; \*\*\*  $P < 0.001$ ; ns: not significant

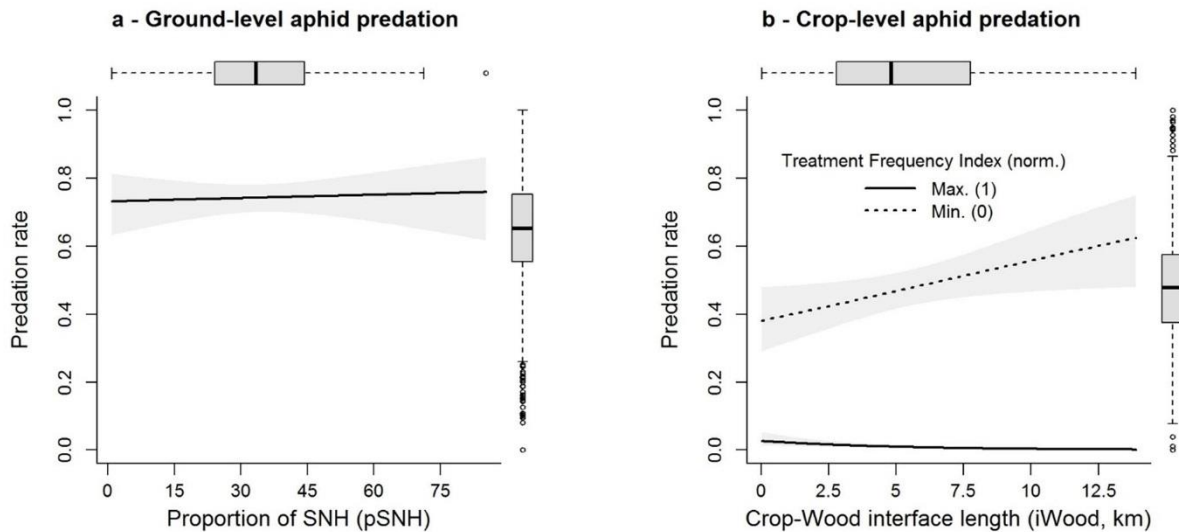

**Figure S7. Partial regression or interaction graphs for the significant effects in the averaged model. Significant effect of pSNH in the case of ground-level aphid predation (a) and significant interaction between TFI and iWood in the case of crop-level aphids (b). Other significant effects are presented in Figure 2 in the main text. Shaded areas correspond to 95% confidence intervals. The boxplot at the top of each graph represents the distribution of the landscape variable; the one on the right represents the distribution of the predictions of the averaged model. Min.: minimal TFI value; Max.: maximal TFI value; TFI: Treatment Frequency Index. SHDI: Shannon diversity index of land cover types; pMeadow: proportion of meadows; pSNH: proportion of semi-natural habitats; pTargetCrop: proportion of target crop; iWood: length of interfaces between crops and woods; iMeadow: length of interfaces between crops and meadows; iSNH: length of interfaces between crops and semi-natural habitats.**

**Table S9. Model ranking according to their AICc value and weight of each model in the calculation of the averaged estimates.**

| Sentinel card type | Model                                                | df | logLik   | AICc    | delta | weight |
|--------------------|------------------------------------------------------|----|----------|---------|-------|--------|
| Weed seed          | CropType+PC1+PC2+PC3+TFI+pTargetCrop+TFI*pTargetCrop | 17 | -1904.72 | 3844.88 | 0.00  | 0.813  |
|                    | CropType+PC1+PC2+PC3+TFI+SHDI+TFI*SHDI               | 17 | -1907.69 | 3850.82 | 5.94  | 0.042  |
|                    | CropType+PC1+PC2+PC3+TFI+pMeadow+TFI*pMeadow         | 17 | -1907.95 | 3851.34 | 6.46  | 0.032  |
|                    | CropType+PC1+PC2+PC3+TFI+iSNH+TFI*iSNH               | 17 | -1908.09 | 3851.62 | 6.74  | 0.028  |
|                    | CropType+PC1+PC2+PC3+TFI+iMeadow+TFI*iMeadow         | 17 | -1908.23 | 3851.90 | 7.02  | 0.024  |
|                    | CropType+PC1+PC2+PC3+TFI+pWood+TFI*pWood             | 17 | -1908.35 | 3852.14 | 7.26  | 0.022  |
|                    | CropType+PC1+PC2+PC3                                 | 14 | -1912.00 | 3852.98 | 8.10  | 0.014  |
|                    | CropType+PC1+PC2+PC3+TFI+iWood+TFI*iWood             | 17 | -1908.84 | 3853.12 | 8.24  | 0.013  |
|                    | CropType+PC1+PC2+PC3+TFI+pSNH+TFI*pSNH               | 17 | -1908.97 | 3853.38 | 8.50  | 0.012  |
| <i>Ephestia</i>    | CropType+PC1+PC2+PC3+TFI+pTargetCrop+TFI*pTargetCrop | 17 | -743.21  | 1521.83 | 0.00  | 0.982  |
|                    | CropType+PC1+PC2+PC3                                 | 14 | -751.31  | 1531.57 | 9.74  | 0.008  |
|                    | CropType+PC1+PC2+PC3+TFI+iWood+TFI*iWood             | 17 | -748.72  | 1532.85 | 11.02 | 0.004  |
|                    | CropType+PC1+PC2+PC3+TFI+pMeadow+TFI*pMeadow         | 17 | -749.46  | 1534.32 | 12.48 | 0.002  |
|                    | CropType+PC1+PC2+PC3+TFI+pSNH+TFI*pSNH               | 17 | -749.46  | 1534.32 | 12.48 | 0.002  |
|                    | CropType+PC1+PC2+PC3+TFI+SHDI+TFI*SHDI               | 17 | -749.66  | 1534.73 | 12.90 | 0.002  |
|                    | CropType+PC1+PC2+PC3+TFI+pWood+TFI*pWood             | 17 | -750.52  | 1536.44 | 14.61 | 0.001  |
|                    | CropType+PC1+PC2+PC3+TFI+iMeadow+TFI*iMeadow         | 17 | -750.90  | 1537.20 | 15.37 | 0.000  |
|                    | CropType+PC1+PC2+PC3+TFI+iSNH+TFI*iSNH               | 17 | -751.22  | 1537.84 | 16.01 | 0.000  |
| Ground-level aphid | CropType+PC1+PC2+PC3+TFI+pMeadow+TFI*pMeadow         | 17 | -1343.54 | 2722.49 | 0.00  | 0.208  |
|                    | CropType+PC1+PC2+PC3+TFI+pTargetCrop+TFI*pTargetCrop | 17 | -1343.57 | 2722.55 | 0.06  | 0.202  |
|                    | CropType+PC1+PC2+PC3+TFI+pSNH+TFI*pSNH               | 17 | -1343.77 | 2722.95 | 0.46  | 0.165  |
|                    | CropType+PC1+PC2+PC3+TFI+SHDI+TFI*SHDI               | 17 | -1343.88 | 2723.17 | 0.68  | 0.148  |
|                    | CropType+PC1+PC2+PC3+TFI+iSNH+TFI*iSNH               | 17 | -1344.27 | 2723.95 | 1.46  | 0.100  |
|                    | CropType+PC1+PC2+PC3+TFI+iMeadow+TFI*iMeadow         | 17 | -1344.36 | 2724.13 | 1.64  | 0.092  |
|                    | CropType+PC1+PC2+PC3+TFI+iWood+TFI*iWood             | 17 | -1344.98 | 2725.37 | 2.88  | 0.049  |
|                    | CropType+PC1+PC2+PC3+TFI+pWood+TFI*pWood             | 17 | -1345.36 | 2726.13 | 3.64  | 0.034  |
|                    | CropType+PC1+PC2+PC3                                 | 14 | -1352.50 | 2733.96 | 11.47 | 0.001  |
| Crop-level aphid   | CropType+PC1+PC2+PC3+TFI+iWood+TFI*iWood             | 17 | -1341.23 | 2717.88 | 0.00  | 0.698  |
|                    | CropType+PC1+PC2+PC3+TFI+pMeadow+TFI*pMeadow         | 17 | -1343.17 | 2721.76 | 3.88  | 0.100  |
|                    | CropType+PC1+PC2+PC3+TFI+pSNH+TFI*pSNH               | 17 | -1343.77 | 2722.96 | 5.08  | 0.055  |
|                    | CropType+PC1+PC2+PC3+TFI+SHDI+TFI*SHDI               | 17 | -1343.94 | 2723.30 | 5.42  | 0.046  |
|                    | CropType+PC1+PC2+PC3                                 | 14 | -1347.39 | 2723.75 | 5.87  | 0.037  |
|                    | CropType+PC1+PC2+PC3+TFI+iSNH+TFI*iSNH               | 17 | -1344.49 | 2724.40 | 6.52  | 0.027  |
|                    | CropType+PC1+PC2+PC3+TFI+iMeadow+TFI*iMeadow         | 17 | -1345.23 | 2725.88 | 8.00  | 0.013  |
|                    | CropType+PC1+PC2+PC3+TFI+pTargetCrop+TFI*pTargetCrop | 17 | -1345.24 | 2725.90 | 8.02  | 0.013  |
|                    | CropType+PC1+PC2+PC3+TFI+pWood+TFI*pWood             | 17 | -1345.46 | 2726.34 | 8.46  | 0.010  |

**Table S10. Averaged estimated effects of the synthetic meteorological variables (PC axes scores), pesticide use intensity index (TFI), landscape variables and their interaction on the four predation rates for different sub-datasets or different TFI calculation. Full dataset: same results as in Table 1 in the main text; Without IFT=0: dataset without all situations with no local pesticide use at all; only herbicides: TFI calculated with only herbicides; without herbicides: TFI calculated with only pesticides that are not herbicides. Grey lines corresponds to significant effects when using the full dataset.**

| Effect          | Weed seed        |                  |                  |                    | Ephestia         |                 |                  |                    | Ground-level aphid |                |                 |                    | Crop-level aphid |                |                 |                    |
|-----------------|------------------|------------------|------------------|--------------------|------------------|-----------------|------------------|--------------------|--------------------|----------------|-----------------|--------------------|------------------|----------------|-----------------|--------------------|
|                 | Full dataset     | Without IFT=0    | Only herbicides  | Without herbicides | Full dataset     | Without IFT=0   | Only herbicides  | Without herbicides | Full dataset       | Without IFT=0  | Only herbicides | Without herbicides | Full dataset     | Without IFT=0  | Only herbicides | Without herbicides |
| PC1             | <b>-1.49 ***</b> | <b>0.93 *</b>    | <b>-1.47 ***</b> | <b>-1.49 ***</b>   | <b>-1.51 ***</b> | <b>1.14 *</b>   | <b>-1.58 ***</b> | <b>-1.48 ***</b>   | 0.23 ns            | 0.16 ns        | 0.15 ns         | 0.22 ns            | -0.40 ns         | -0.44 ns       | -0.44 ns        | -0.39 ns           |
| PC2             | <b>-0.68 *</b>   | <b>-1.11 ***</b> | <b>-0.63 *</b>   | <b>-0.67 *</b>     | -0.56 ns         | <b>-1.06 **</b> | -0.58 ns         | -0.54 ns           | 0.28 ns            | 0.26 ns        | 0.45 ns         | 0.30 ns            | -0.30 ns         | -0.30 ns       | -0.20 ns        | -0.34 ns           |
| PC3             | <b>-0.73 *</b>   | 0.28 ns          | <b>-0.71 *</b>   | <b>-0.73 *</b>     | <b>1.06 *</b>    | <b>1.24 **</b>  | <b>1.06 *</b>    | <b>1.03 *</b>      | 0.26 ns            | 0.29 ns        | 0.32 ns         | 0.26 ns            | -0.38 ns         | -0.37 ns       | -0.39 ns        | -0.38 ns           |
| TFI             | -1.16 ns         | -1.07 ns         | -0.74 ns         | -1.11 ns           | <b>-2.23 *</b>   | -1.80 ns        | -1.80 ns         | <b>-2.25 *</b>     | -0.47 ns           | -0.20 ns       | -0.54 ns        | -0.15 ns           | 0.53 ns          | 0.47 ns        | 1.38 ns         | -0.01 ns           |
| SHDI            | 1.43 ns          | <b>1.59 *</b>    | 0.89 ns          | 1.16 ns            | 1.31 ns          | 1.83 ns         | 1.68 ns          | 1.03 ns            | <b>1.67 *</b>      | <b>1.82 *</b>  | <b>1.60 *</b>   | <b>1.35 ns</b>     | 0.06 ns          | 0.16 ns        | 0.10 ns         | -0.40 ns           |
| pWood           | -1.01 ns         | -1.10 ns         | -0.91 ns         | -0.80 ns           | 1.08 ns          | 1.42 ns         | 0.91 ns          | 0.52 ns            | 0.68 ns            | 0.89 ns        | 1.19 ns         | 0.18 ns            | 0.05 ns          | 0.18 ns        | 0.41 ns         | -0.49 ns           |
| pMeadow         | 1.11 ns          | 1.18 ns          | 0.60 ns          | 1.06 ns            | 1.20 ns          | 1.57 ns         | 1.05 ns          | 1.21 ns            | <b>1.58 *</b>      | <b>1.56 *</b>  | <b>1.36 ns</b>  | <b>1.63 *</b>      | 0.85 ns          | 0.85 ns        | 0.95 ns         | 0.60 ns            |
| pSNH            | 0.64 ns          | 0.71 ns          | 0.09 ns          | 0.63 ns            | 1.53 ns          | <b>2.00 *</b>   | 1.42 ns          | 1.28 ns            | <b>1.62 *</b>      | <b>1.68 *</b>  | <b>1.68 *</b>   | <b>1.41 *</b>      | 0.76 ns          | 0.79 ns        | 0.94 ns         | 0.32 ns            |
| pTargetCrop     | <b>-1.61 *</b>   | <b>-1.64 *</b>   | <b>-1.36 ns</b>  | <b>-1.56 *</b>     | <b>-3.75 ***</b> | <b>-3.44 **</b> | <b>-2.85 **</b>  | <b>-3.64 ***</b>   | -0.95 ns           | -0.69 ns       | <b>-1.63 *</b>  | -0.67 ns           | -0.51 ns         | -0.29 ns       | -1.36 ns        | 0.54 ns            |
| iWood           | -0.48 ns         | -0.61 ns         | -0.35 ns         | -0.41 ns           | <b>1.57 *</b>    | <b>1.19 ns</b>  | <b>1.33 ns</b>   | <b>1.31 ns</b>     | 0.88 ns            | 0.66 ns        | 1.28 ns         | 0.68 ns            | 0.99 ns          | 0.83 ns        | 1.29 ns         | 0.69 ns            |
| iMeadow         | 0.42 ns          | 0.50 ns          | 0.22 ns          | 0.10 ns            | -0.71 ns         | -0.28 ns        | -0.34 ns         | -0.53 ns           | 1.02 ns            | 1.08 ns        | 0.62 ns         | 0.47 ns            | 0.50 ns          | 0.55 ns        | 0.27 ns         | 0.30 ns            |
| iSNH            | 0.02 ns          | 0.02 ns          | -0.07 ns         | -0.21 ns           | 0.32 ns          | 0.42 ns         | 0.60 ns          | 0.33 ns            | 1.47 ns            | 1.36 ns        | 1.29 ns         | 0.92 ns            | 0.63 ns          | 0.57 ns        | 0.31 ns         | 0.30 ns            |
| TFI*SHDI        | -2.82 ns         | -3.04 ns         | -1.31 ns         | -2.37 ns           | -1.07 ns         | -2.43 ns        | -2.08 ns         | -0.33 ns           | -3.13 ns           | -3.48 ns       | -2.73 ns        | -2.58 ns           | -1.70 ns         | -1.90 ns       | -1.45 ns        | -0.61 ns           |
| TFI*pWood       | 2.21 ns          | 2.11 ns          | 1.76 ns          | 1.89 ns            | -2.67 ns         | -3.74 ns        | -1.94 ns         | -1.37 ns           | -1.14 ns           | -1.62 ns       | -2.22 ns        | 0.25 ns            | -0.23 ns         | -0.52 ns       | -1.03 ns        | 1.39 ns            |
| TFI*pMeadow     | -2.27 ns         | -2.22 ns         | -0.70 ns         | -2.37 ns           | -1.64 ns         | -2.48 ns        | -1.32 ns         | -1.85 ns           | <b>-4.10 *</b>     | <b>-4.03 *</b> | <b>-3.13 ns</b> | <b>-4.78 *</b>     | <b>-3.19 *</b>   | <b>-3.15 *</b> | <b>-2.92 ns</b> | <b>-2.88 ns</b>    |
| TFI*pSNH        | -1.24 ns         | -1.36 ns         | 0.36 ns          | -1.31 ns           | -2.67 ns         | -3.93 ns        | -2.32 ns         | -2.21 ns           | -3.88 ns           | <b>-4.01 *</b> | <b>-3.63 *</b>  | -3.67 ns           | -2.87 ns         | -2.94 ns       | -2.84 ns        | -1.91 ns           |
| TFI*pTargetCrop | 1.57 ns          | 1.58 ns          | 0.88 ns          | 1.67 ns            | <b>6.95 **</b>   | <b>6.30 *</b>   | <b>4.18 *</b>    | <b>7.93 **</b>     | 0.43 ns            | -0.18 ns       | 2.16 ns         | -0.52 ns           | 1.07 ns          | 0.55 ns        | 3.04 ns         | -2.23 ns           |
| TFI*iWood       | 0.49 ns          | 0.69 ns          | 0.23 ns          | 0.42 ns            | -2.60 ns         | -2.07 ns        | -1.90 ns         | -2.06 ns           | -1.55 ns           | -1.09 ns       | -2.43 ns        | -1.06 ns           | <b>-3.82 **</b>  | <b>-3.48 *</b> | <b>-4.19 **</b> | <b>-3.36 *</b>     |
| TFI*iMeadow     | -2.18 ns         | -2.23 ns         | -1.10 ns         | -1.69 ns           | 0.84 ns          | -0.35 ns        | 0.13 ns          | 0.41 ns            | -3.20 ns           | -3.36 ns       | -1.41 ns        | -2.27 ns           | -0.63 ns         | -0.78 ns       | -0.17 ns        | -0.22 ns           |
| TFI*iSNH        | -1.81 ns         | -1.80 ns         | -1.00 ns         | -1.43 ns           | -0.33 ns         | -1.13 ns        | -0.71 ns         | -0.32 ns           | -3.59 ns           | -3.45 ns       | -2.22 ns        | -2.50 ns           | -2.30 ns         | -2.27 ns       | -1.10 ns        | -1.67 ns           |
